# Bronze Age Northern Eurasian Genetics in the Context of Development of Metallurgy and Siberian Ancestry

Ainash Childebayeva<sup>1,2\*</sup>, Fabian Fricke<sup>3</sup>, Adam Benjamin Rohrlach<sup>1,4</sup>, Lei Huang<sup>1</sup>, Stephan Schiffels<sup>1</sup>, Outi Vesakoski<sup>5</sup>, Lena Semerau<sup>1</sup>, Franziska Aron<sup>6</sup>, Vyacheslav Moiseyev<sup>7</sup>, Valery Khartanovich<sup>7</sup>, Igor Kovtun<sup>8</sup>, Johannes Krause<sup>1</sup>, Sergey Kuzminykh<sup>9</sup>, Wolfgang Haak<sup>1\*</sup>

<sup>1</sup>*Department of Archaeogenetics, Max Planck Institute for Evolutionary Anthropology, D-04103 Leipzig, Germany*

<sup>2</sup>*Department of Anthropology, University of Kansas, Lawrence, KS 66044, USA*

<sup>3</sup>*German Archaeological Institute, Eurasia Department, Berlin 14195, Germany*

<sup>4</sup>*School of Computer and Mathematical Sciences, University of Adelaide, Adelaide SA 5005, Australia*

<sup>5</sup>*Department of Finnish and Finno-Ugric Languages, University of Turku, Turku 20014, Finland*

<sup>6</sup>*Department of Archaeogenetics, Max Planck Institute for the Science of Human History, Jena 07745, Germany*

<sup>7</sup>*Peter the Great Museum of Anthropology and Ethnography (Kunstkamera), Russian Academy of Sciences, University Embankment, 3, Saint Petersburg 199034, Russia*

<sup>8</sup>*T.F. Gorbachev Kuzbass State Technical University, Department of History, Philosophy and Social Sciences, Kemerovo 650000, Russia*

<sup>9</sup>*Russian Academy of Sciences, Institute of Archaeology, Laboratory of Natural Scientific Methods, Moscow 117292, Russia*

## \* Corresponding authors:

Ainash Childebayeva ([ainash\\_childebayeva@eva.mpg.de](mailto:ainash_childebayeva@eva.mpg.de)), Wolfgang Haak ([wolfgang\\_haak@eva.mpg.de](mailto:wolfgang_haak@eva.mpg.de))

## Author Contributions:

Conceptualization: WH, AC

Methodology: LS, FA

Investigation: AC, WH, FF, ABR, LH

Visualization: AC, WH, FF

Supervision: WH, JK, SS

Resources: FF, VM, VK, IK, SK

Writing—original draft: AC, WH

Writing—review & editing: WH, AC, ABR, FF, LH, SK, OV

**Competing Interest Statement:** We do not have any competing interests

36 **Classification:** Social sciences, Anthropology, Population Genetics.

37 **Keywords:** ancient DNA, Bronze Age Eurasia, Siberian Ancestry, population genetics.

38

39 **This PDF file includes:**

40 Main Text

41 Figures 1 to 6

42 Tables 1

43

## 44 **Abstract**

45

46 The Eurasian Bronze Age (BA) has been described as a period of substantial human  
47 migrations, the emergence of pastoralism, horse domestication, and development of  
48 metallurgy. This study focuses on individuals associated with BA metallurgical production,  
49 specifically the Seima-Turbino (ST) phenomenon (~2,200-1,900 BCE) associated with  
50 elaborate metal objects found across Northern Eurasia. The genetic profiles of nine ST-  
51 associated individuals vary widely ranging between ancestries maximized in individuals from  
52 the Eastern Siberian Late Neolithic/BA, and those of the Western Steppe Middle Late BA. The  
53 genetic heterogeneity observed is consistent with the current understanding of the ST  
54 metallurgical network as a transcultural phenomenon. The new data also shed light on the  
55 temporal and spatial range of an ancient Siberian genetic ancestry component, which is shared  
56 across many Uralic-speaking populations, and which we explore further via demographic  
57 modeling using additional genome-wide (2 individuals) and whole genome data (5 individuals,  
58 including a ~30x genome) from northwestern Russia.

59

## 60 **Introduction**

61

62 Bronze Age Eurasia (~3000-1000 BCE) is characterized by the development of metallurgy,  
63 one of the most important cultural innovations in human history. The Early Bronze Age in  
64 Eurasia (~3000 BCE) is associated with the emergence of the Circumpontic Metallurgical  
65 Province, and eastward expansion of metallurgical production and exchange across the  
66 Eurasian steppe<sup>1-3</sup>. In the Late Bronze Age (~2200–1000 BCE), a westward movement of  
67 materials was also detected, specifically in connection with the so-called Seima-Turbino  
68 (henceforth ST) phenomenon<sup>1,2</sup> as seen by the presence of specific metal artifacts throughout  
69 the forest and forest-steppe regions of Northern Eurasia<sup>4</sup>.

70

71 The ST is represented by several sites throughout Eurasia dating to ~2,200-1,900 BCE and  
72 constitutes a “metallurgical network” represented by many shared traits, such as the use of tin-  
73 copper, comparable artifact types, and shared metallurgical technologies that may have  
74 involved a movement of craft workers and/or groups<sup>4,5</sup>. The ST has been described as a  
75 “transcultural” phenomenon, i.e., a network of metallurgical production with shared traits on  
76 top of the underlying basis of consistent pottery types in the different areas associated with  
77 various archaeological cultures throughout northern Eurasia.

78

79 The name Seima-Turbino derives from the two eponymous burial grounds Seima and Turbino  
80 excavated in the beginning of the 20<sup>th</sup> century CE<sup>4</sup>. The ST phenomenon combines elements  
81 of several cultures and does not represent a single culture in itself, especially since there are  
82 no distinct settlements or pottery styles associated with it. Instead, certain metal objects, which  
83 were found throughout Eurasia, from China and Central Asia in the East to Finland and  
84 Moldova in the West, spanning across approximately three million square kilometers,  
85 represent key ST-associated criteria (see Supplementary Note 1, Figure 1, and Supplementary  
86 Figure 1). In the entire spatial distribution of the ST, there is a certain degree of regional  
87 variation (see Supplementary Note 1). Briefly, the artifacts in the east contain higher amounts  
88 of tin (Sn) (Supplementary Figures 2 and 3) and more casting molds have been identified in  
89 the east compared to the west of the Urals, although a greater number and variation of ST  
90 objects have been found west of the Urals (Figure 1c). The metallic inventory of ST-complexes  
91 can be divided into two major groups: (1) objects that can be attributed to Eurasian  
92 archaeological cultures, such as Alakul, Abashevo, Sintashta, Petrovka and Srubnaya; (2)  
93 objects that are only known from ST-sites (socket axes, lamellar dagger blades, fully hilted  
94 daggers and knives and the so-called forked lanceheads) (Figure 1c). Singular finds of objects  
95 and weaponry of the ST type have been reported from contexts otherwise attributed to Bronze  
96 Age Glazkovo, Okunevo, Elunino, Odino, Krotovo, Koptyaki, Sintashta, Petrovka, Abashevo,  
97 Srubnaya (Pokrovka), and Post-Fatyanovo cultures<sup>4,6</sup>. However, these finds are rare and most  
98 ST materials are found at ST-associated sites.

99  
100 The people buried with ST-objects have been described as metallurgists who developed  
101 elaborate and distinct bronze objects, and possibly used river systems for transportation<sup>4</sup>.  
102 Even though the horse plays a central role in the ST iconography, it remains unclear whether  
103 people associated with the phenomenon were using horses for riding, traction or transport. It  
104 has been hypothesized that the number of people associated with the ST phenomenon was  
105 small, since there are very few sites with human remains linked to the phenomenon, and ST  
106 metal artifacts are comparably few but geographically widespread. ST burials are very distinct  
107 from those of the other North Eurasian cultures: individuals were buried mostly without pottery  
108 and not in kurgans, both inhumations and cremations were common, and the grave goods  
109 included bronze, stone, and bone weaponry, as well as bone armor. In cases where pottery is  
110 present at ST-sites, it can be attributed to other local cultures, for example Koptyaki at the site  
111 Shaitanskoe Ozero II<sup>7</sup>. The early history of the ST phenomenon is not well understood,  
112 however, based on the presence of tin and copper in metal alloys of ST objects, the Altai and  
113 Tian-Shan mountains have been proposed<sup>4,8</sup>.

114

115 Here, we present ancient human DNA data from a well-known, ST-associated site Rostovka  
116 (ROT), which is one of the very few ST sites with preserved human remains. The majority of  
117 the graves found at Rostovka contain bronze ST objects, bronze weapons and tools, casting  
118 molds, jewelry, bone knife handles, and armor plates<sup>9</sup>. In fact, the majority of Rostovka burials  
119 contain weapons, found in 60% of the female and 80% of the male burials<sup>10</sup>. The radiocarbon  
120 dates for Rostovka, excluding extreme values, range between ca. 2200-2000 cal. BCE<sup>3,9,11</sup>.  
121 This chronological horizon is simultaneous with the Okunevo culture, while its lower bound  
122 overlaps with the early Abashevo and Sintashta cultures, among others (Fig. 1b).

123

124 An identifying component in the genetic landscape of Northern Eurasia is a shared Siberian  
125 ancestry component, which is present in the genetic profiles of Finnish, Estonian, Saami-  
126 speaking, and indigenous Siberian populations today<sup>12</sup>. A previous ancient DNA study focusing  
127 on the Eastern Baltic found a genetic contribution from Siberia in the Iron Age but not in the  
128 Bronze Age, which was linked to the time of the arrival of Uralic languages to the region<sup>13</sup>.  
129 Moreover, the Y-haplogroup N1a1a1a1a (previously known as N3a), primarily found in  
130 present-day northern Eurasian and Uralic speaking groups, first appears in Europe in Early  
131 Metal Age individuals from the Bolshoy Oleni Ostrov site (BOO)<sup>14</sup>, in northwestern Russia,  
132 together with evidence of high levels of genome-wide Siberian ancestry<sup>15</sup>.

133

134 We present new genome-wide data from two additional BOO individuals and shotgun data for  
135 five published individuals (including one high coverage genome of ~31x). Direct or indirect  
136 contacts between BOO and southern and western Scandinavia have been proposed based on  
137 genetic data and the archaeological record<sup>14-16</sup>, but BOO has not been associated with any  
138 known early Metal Age cultures.

139

140 Here, we report the results of joint population genetic analyses of both sites in comparison with  
141 published ancient data from chronologically, geographically, and archaeologically relevant  
142 cultures of the forest-tundra (taiga and tundra) and forest-steppe zones of Eurasia. We also  
143 investigate the demographic history of Northern Eurasia, especially in context of the Siberian  
144 genetic component. Together, we aim to provide an updated view on the genetic history and  
145 connections of populations of the forest-steppe and western Siberia, with an emphasis on the  
146 ST phenomenon in the context of metallurgical production.

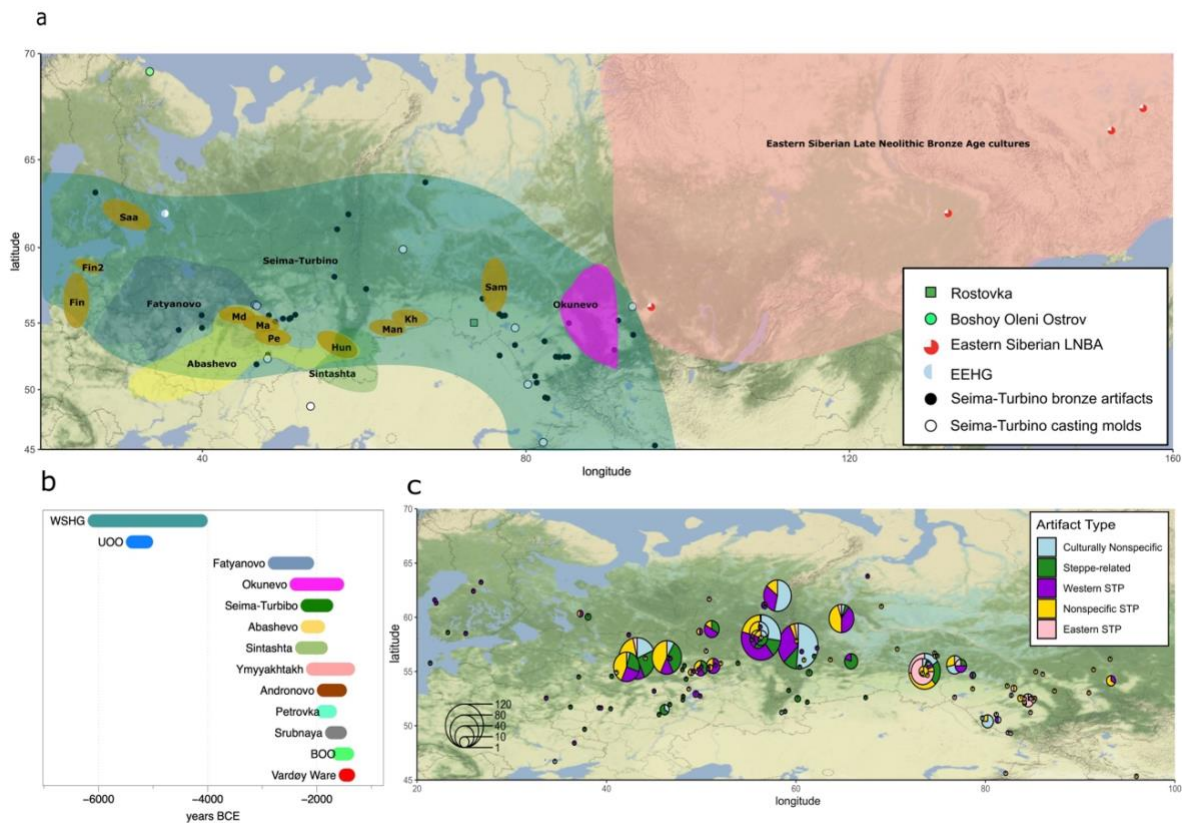

147

148 **Figure 1.** (a) Geographic map with ROT and BOO indicated, also showing hypothetical origin  
 149 locations for ancestral stages of Uralic subfamilies (Saa=Saami, Fin/Fin2=Finnic, Man=Mansi,  
 150 Kh=Khanty, Sam=Samoyedic, Hun=Hungarian, Md=Mordvin, Ma=Mari, Pe=Permic), and a  
 151 distribution of contemporaneous archaeological cultures (adapted from Grünthal et al. 2022),  
 152 (b) Chronology of Seima-Turbino (ST is including ROT) and BOO individuals together with  
 153 relevant Bronze Age groups of Northern Eurasia. The timeline is based on a combination of  
 154 absolute ( $^{14}\text{C}$ ) and relative dates, (c) Cultural/regional attribution of the metallic inventory of  
 155 the sites of the ST phenomenon. Pie charts indicate the breakdown of artifacts at specific sites  
 156 by cultural/regional attribution.

157

158

159  
160

**Table 1. General overview of the ROT and BOO individuals included in the study.**

| Sample | Gen. sex | 1240k SNPs | Shotgun coverage | Y hg      | Y hg terminal SNP | MT hg           | Date                                                       |
|--------|----------|------------|------------------|-----------|-------------------|-----------------|------------------------------------------------------------|
| ROT002 | YV       | 311,602    | -                | N1a1a1a1a | L392              | C2a1            | 1028-1700 calBC ( $\pm 2\sigma$ )*                         |
| ROT003 | XY       | 40,320     | -                | R1a1a1    | M417              | R1a1a           | ca. 4150-3800 BP, stratigraphic context                    |
| ROT004 | YV       | 104,706    | -                | C1b       | M246              | H1              | 2202-1082 calBC ( $\pm 2\sigma$ )*                         |
| ROT006 | XY       | 33,591     | -                | R1b1a1a   | M73               | A10             | ca. 4150-3800 BP, stratigraphic context                    |
| ROT011 | YV       | 44,705     | -                | C2a       | L1272             | C1              | 2051-1174 calBC ( $\pm 2\sigma$ )*                         |
| ROT013 | XX       | 25,543     | -                | -         | -                 | R1b1            | ca. 4150-3800 BP, stratigraphic context                    |
| ROT015 | YV       | 116,504    | -                | C2a1a1    | F0002             | C1a             | 2122-1010 calBC ( $\pm 2\sigma$ )*                         |
| ROT016 | XY       | 257,502    | -                | R1a1a1b   | Z645              | U5a1+@1619<br>2 | 2137-1919 calBC ( $\pm 2\sigma$ )*<br><br>ca. 4150-3800 BP |
| BOO001 | XX       | -          | 2.4x             | -         | -                 | U4a1***         | -                                                          |
| BOO004 | XY       | -          | 31.8x            | N1a1a1a1a | L392              | C4b***          | 1735-1538 calBC ( $\pm 2\sigma$ )                          |
| BOO006 | XX       | -          | 2.6x             | -         | -                 | D4e4***         | -                                                          |
| BOO008 | YV       | 606,672    | -                | -         | -                 | Z1a1a           | -                                                          |
| BOO009 | XX       | 814,966    | -                | -         | -                 | U5a2            | 925-830 calBC ( $\pm 1\sigma$ )** from charcoal            |

161 \*from <sup>9</sup>

162 \*\*from <sup>16</sup>

163 \*\*\*from <sup>15</sup>

164 Gen. sex=genetic sex, 1240k SNPs = SNP coverage on the 1240k array, Y hg = Y  
165 chromosome haplogroup, MT hg = mtDNA haplogroup.

166

## 167 Results

168

169 In this study, we report genome-wide SNP data for nine individuals from the ST site Rostovka,  
170 as well as additional new data for two BOO individuals (plus shotgun genome data for five  
171 already published individuals) (Fig. 1a). We performed 1240k SNP<sup>17,18</sup> and mitochondrial  
172 genome captures on the nine individuals from ROT, and the two new BOO individuals, as well  
173 as Y-chromosomal capture<sup>19</sup> on just the males. Lastly, we generated shotgun sequence data  
174 for five published BOO individuals, including one 31.8x covered individual (Fig. 1a, Table 1,  
175 Supplementary Table 1). Of the newly analyzed individuals, eight ROT individuals were  
176 genetically male and one was female, while both new BOO individuals were female (Table 1).  
177 Biological relatedness analysis of the newly reported individuals was performed using READ<sup>20</sup>  
178 and IcMLkin<sup>21</sup>. Based on these analyses, we identified a pair of second-degree relatives  
179 (ROT011 and ROT015), both of whom are males carrying the Y-haplogroup C2a, and could  
180 either represent a grandson/grandparent, a nephew/uncle pair or paternal half-siblings,  
181 consistent with overlapping radiocarbon dates for both individuals (Table 1). A second-degree  
182 related pair was also found among the BOO individuals (BOO004-BOO005).

183 We also generated a radiocarbon date for individual BOO004, whose genome was shotgun  
184 sequenced to 31.8x coverage (Table 1). The radiocarbon date (MAMS-57646) for this  
185 individual was determined to be 3351±25 BP, or 1735-1538 calBC (± 2σ) after calibration with  
186 OxCal 4.4<sup>22</sup>. However, we did not correct for a potential freshwater reservoir effect, which may  
187 place BOO004 at a younger date.

188

189 **General population genetic results.** We used smartPCA<sup>23</sup> to perform a principal component  
190 analysis (PCA) of modern-day reference populations from Eurasia and the Americas, onto  
191 which the ROT and the BOO individuals were projected (Fig. 2a and b). When assessing the  
192 genetic structure of Eurasian populations, plotting PC1 vs. PC2 (Fig. 2a) allows us to separate  
193 west and east Eurasian populations from the Native American groups, while plotting PC1 vs  
194 PC3 (Fig. 2b) distinguishes the major Eurasian ecological zones<sup>24,25</sup>. Looking at the newly  
195 generated data, ST individuals spread widely on the Eurasian PCA (PC1 vs PC3), mainly  
196 throughout the so-called 'forest-tundra' genetic cline (Fig. 2b) mirroring the distribution of the  
197 modern Uralic speakers (Supplementary Figure 4). Based on an unsupervised ADMIXTURE  
198 analysis<sup>26</sup> of a reference set of published ancient data with K=7 clusters (Fig. 2c,  
199 Supplementary Figure 5), the ROT individuals generally carry diverse ancestry components  
200 ranging between a genetic profile represented by the Western Steppe Middle Late Bronze Age  
201 cluster (Western\_Steppe\_MLBA, we use Sintashta\_MLBA when modeling this ancestry going  
202 forward)<sup>27</sup> - a combination of orange and dark and light blue colors - and that of the Late  
203 Neolithic/Bronze Age East Siberians (Eastern\_Siberia\_LNBA)<sup>28</sup> - red color (Fig. 2c). In



204 comparison, the BOO individuals form a tighter and more homogeneous cluster that can be  
 205 seen with both the PCA and the ADMIXTURE analyses, in line with what has been previously  
 206 reported<sup>15</sup>.

207

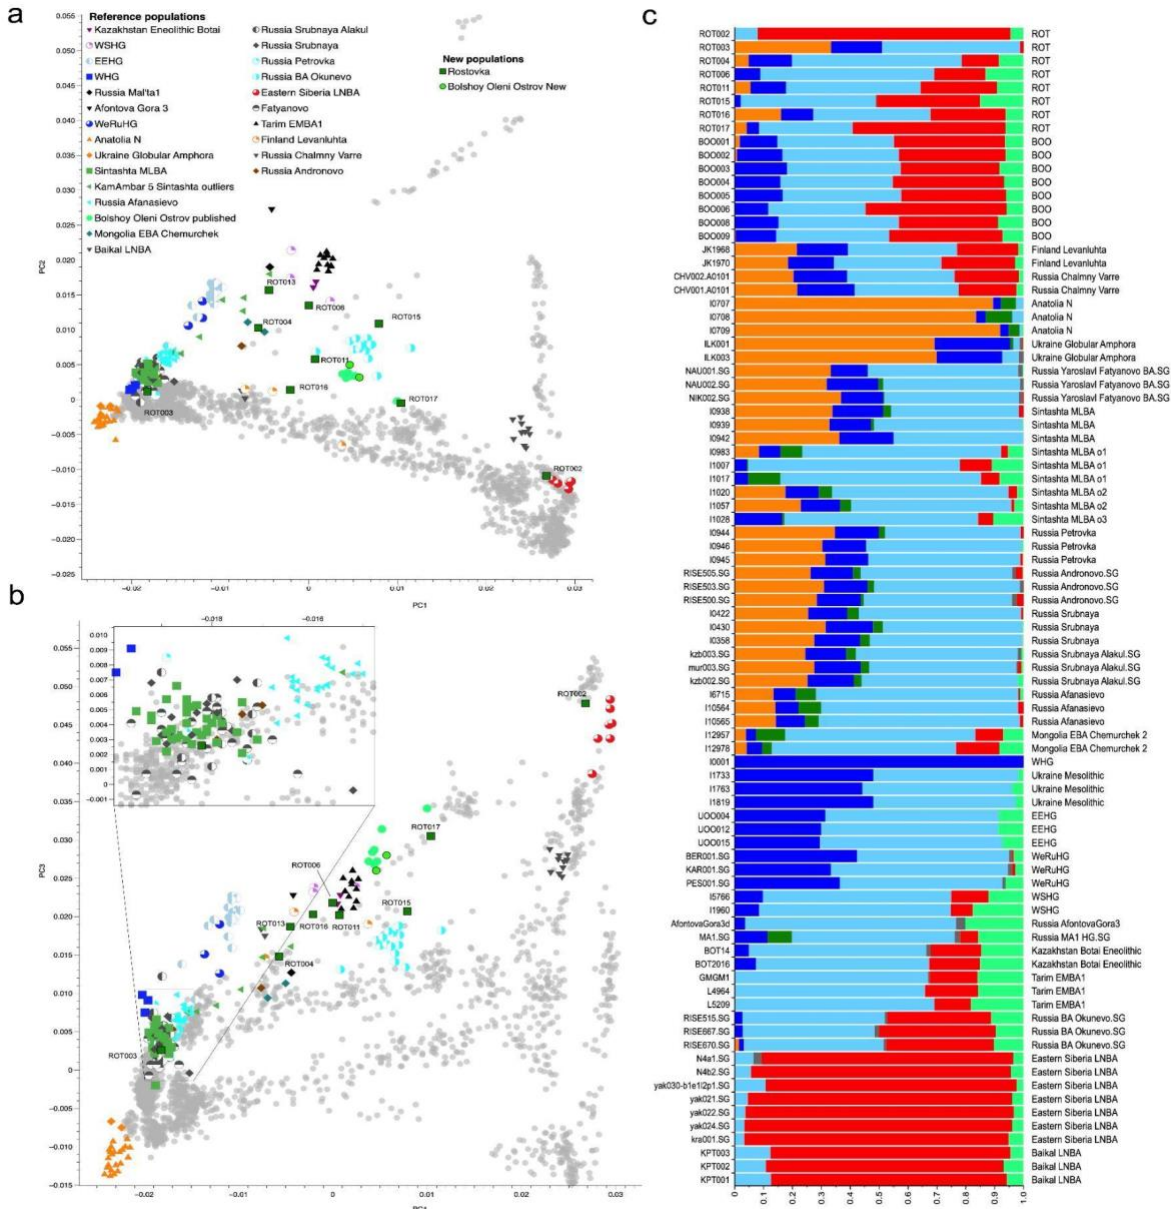

208

209 **Figure 2.** (a) PCA results with ancient individuals projected onto modern variation calculated  
 210 using modern Eurasian populations. Modern samples are shown in gray. Ancient reference  
 211 individuals are listed under “Reference populations”, and the new individuals are listed under  
 212 “New populations”. PC1 vs PC2 are plotted; (b) PCA results for PC1 vs PC3; (c) Unsupervised  
 213 ADMIXTURE results with the relevant populations and sample names shown (k=7).

214

215

216 **F-statistics and qpAdm.** We calculated various F-statistics<sup>29</sup> to formally assess the  
217 relationship of the ROT and BOO individuals with each other, and with different modern and  
218 ancient reference individuals and populations. First, we performed outgroup  $f_3$ -statistics of the  
219 form  $f_3(\text{Mbuti}; \text{test}, \text{modern})$  to test for the affinity of each ROT and BOO individual with modern  
220 Eurasian populations (Supplementary Figure 6, Supplementary Table 2). The  $f_3$ -statistics  
221 results mirrored the distribution of the samples in the PCA and ADMIXTURE analyses, wherein  
222 the individuals with higher proportions of Eastern\_Siberia\_LNBA ancestry (e.g. ROT002)  
223 showed a greater affinity to the modern-day Siberian and Uralic-speaking populations, such  
224 as Nganasan, Evenk, Negidal, Nanai, and Ulchi (Supplementary Figure 6A), whereas the  
225 individuals with more Sintashta-like Western\_Steppe\_MLBA ancestry (e.g. ROT003) were  
226 closer to modern-day (North) Europeans, including Norwegian, Belarusian, Lithuanian,  
227 Scottish and Icelandic individuals (Supplementary Figure 6B). Comparisons with ancient  
228 groups using  $f_3(\text{Mbuti}; \text{test}, \text{published ancient})$  showed a similar trend (Supplementary Figure  
229 6). For example, ROT002 on the ‘eastern end’ of the Eurasian cline, had the highest observed  
230  $f_3$ -values, i.e. shared more genetic drift, with Eastern\_Siberia\_LNBA, Russia Ust Belaya  
231 Neolithic, and Mongolia Early Iron Age individuals (Supplementary Figure 6A). By contrast,  
232 ROT003, the ‘westernmost’ individual in the Eurasian PCA space, had the highest affinity with  
233 Lithuania early Middle Neolithic Narva, Russia Sintashta, Kazakhstan Georgievsky Middle  
234 Bronze Age, Russia Poltavka, and Serbia Mesolithic individuals (Supplementary Figure 6B).  
235 Similar trends could be observed for the BOO, wherein the modern Uralic-speaking  
236 populations, such as Nganasan and Selkup, were among the models with the highest  $f_3$ -  
237 statistics. Among the ancient  $f_3$  comparisons, the most closely related individuals to BOO were  
238 the Eastern European and West-Siberian hunter-gatherers (EEHG and WSHG), published  
239 BOO, and Botai Eneolithic individuals from Kazakhstan (Supplementary Figures 6J and K).

240  
241 Based on the geographic location of the sites, the results of the outgroup  $f_3$ -statistics, and the  
242 distribution of the ROT and BOO individuals on the PCA, we tested whether these individuals  
243 retained more local Ancient North Eurasian (ANE) ancestry compared to contemporaneous  
244 groups and individuals from the general region. To assess the genetic affinities of ROT and  
245 BOO to known populations from similar general geographic area, time period, and  
246 archaeological affiliation, we calculated  $f_4$ -statistics of the form  $f_4(X, \text{test}, \text{WSHG}, \text{Mbuti})$  where  
247 X stood for ROT and BOO individuals, and *test* populations included Okunevo,  
248 Tarim\_EMBA\_1, Sintashta\_MLBA, and Eastern\_Siberia\_LNBA (Fig. 3). This test allowed us  
249 to identify groups that are cladal with ROT and BOO (i.e., equidistantly related to WSHG), and  
250 cases where ROT and BOO may have additional affinity to ANE (represented here by WSHG  
251 from Tyumen oblast, Russia as the best spatial and temporal proxy). Based on the  $f_4$ -statistics,  
252 we find that ROT and BOO individuals carry excess affinity to ANE when compared to

253 Eastern\_Siberia\_LNBA (Fig. 3A) and Russia MLBA Sintashta (Fig. 3C), except for ROT002  
 254 and ROT003. All BOO individuals are symmetrically related with the Okunevo Bronze Age  
 255 group indicating no additional affinity to ANE (Fig. 3B). However, we see more heterogeneity  
 256 in ROT, with some individuals having significantly more, and others significantly less genetic  
 257 affinity to WSHG compared to Okunevo (Fig. 3B). All but one individual (ROT013) have  
 258 significantly less ANE ancestry compared to Tarim EMBA (Fig. 3D). The general observations  
 259 from  $f_4$ -statistics mirror the trends we see in the PCA, especially when PC1 is plotted against  
 260 PC2, wherein ROT individuals vary with regards to their location on the ANE cline represented  
 261 by Afontova Gora 3 and Mal'ta 1, while the BOO individuals are more homogeneous (Fig. 2B).  
 262

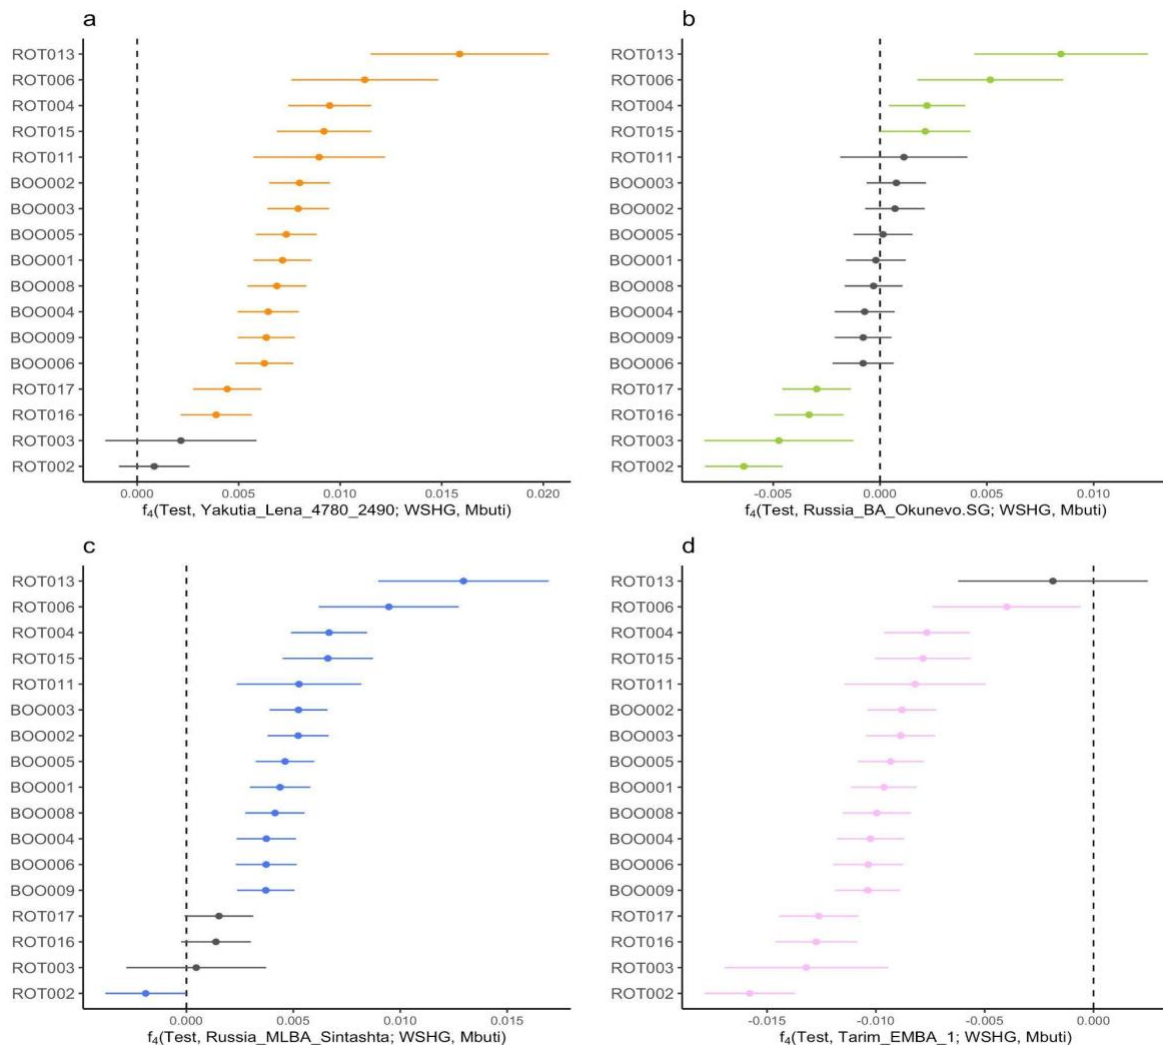

263  
 264 **Figure 3.  $f_4$ -statistics testing for excess ANE ancestry in ROT and BOO individuals.**  
 265 Testing for excess ANE ancestry with respect to: (a) Yakutia Lena 4780-2490, (b) Okunevo,  
 266 (c) Russia MLBA Sintashta, (d) Tarim EMBA1. Significantly non-zero  $f_4$ -statistics ( $|Z| > 3$ ) are  
 267 shown in color, and non-significant  $f_4$ -statistics are shown in gray. All error bars indicate 3  
 268 standard errors. “Test” denotes the individuals given on the y-axis.

269

270 The cultural affiliation of the BOO individuals remains poorly understood. Based on the  
271 archaeological information, such as the presence of 'Waffle' ware ceramics that are similar to  
272 the Neolithic pottery from Yakutia and Chukotka<sup>16</sup>, it was hypothesized that the BOO  
273 individuals represent a westward migration of Siberian populations along the forest-tundra and  
274 forest-steppe zones. However, potential contacts with Scandinavian archaeological cultures,  
275 such as Vardøy Ware, have been proposed for BOO<sup>16</sup>. To test this, we calculated pairwise  $f_3$ -  
276 statistics with different ancient populations from Scandinavia, which separated the BOO  
277 individuals, as well the ROT from the rest of the populations ranging between Mesolithic to  
278 Medieval time periods (Supplementary Figure 7). Together, these results suggest a non-local  
279 genetic origin for the BOO individuals, and no substantial levels of early farmer ancestry,  
280 consistent with PCA and admixture analyses.

281

282 Lastly, we performed qpAdm analysis to formally test for and quantify the admixture  
283 proportions in ROT and BOO individuals that we had identified in the previous analyses (Fig.  
284 4, Supplementary Table 3). Here, we could successfully model the ROT individuals as a mix  
285 of three ancestries, Eastern\_Siberia\_LNBA, Sintashta\_MLBA, and WSHG, except for  
286 ROT002, which could be modeled instead as a two-source mixture of mainly  
287 Eastern\_Siberia\_LNBA ancestry and a smaller proportion of EEHG-like ancestry that could be  
288 represented by either Sintashta\_MLBA, WSHG, or EEHG, whereas ROT003 could be  
289 modeled with Sintashta\_MLBA as single source (Fig. 4B). We also tested whether ROT  
290 individuals could be modeled as a two-way mixture of the Eastern\_Siberia\_LNBA ancestry and  
291 either Sintashta\_MLBA or WSHG as sources, however, this combination of ancestries did not  
292 result in consistently plausible model fits, compared to the combination of all three ancestries  
293 (Fig. 4a-c). By contrast, BOO individuals could not be modeled using either the combination of  
294 all three ancestry sources (Eastern\_Siberia\_LNBA, Sintashta\_MLBA, and WSHG), or just a  
295 two-way mixture (Fig. 4a and c, Supplementary Table 3). However, replacing WSHG with  
296 EEHG as the putative local hunter-gatherer ancestry stratum and using  
297 Eastern\_Siberia\_LNBA as a second source provided good model fits (Fig. 4D, Supplementary  
298 Table 4).

299

300 We then estimated the date of the admixture event in BOO individuals between the EEHG and  
301 Eastern\_Siberia\_LNBA sources using DATES v.753<sup>30</sup>. The admixture date was estimated to  
302 be  $17.98 \pm 1.06$  generations ago, or around 500 calendar years prior to the mean radiocarbon  
303 date of BOO, assuming a generation time of 29 years<sup>31</sup> (Supplementary Figure 8).

304

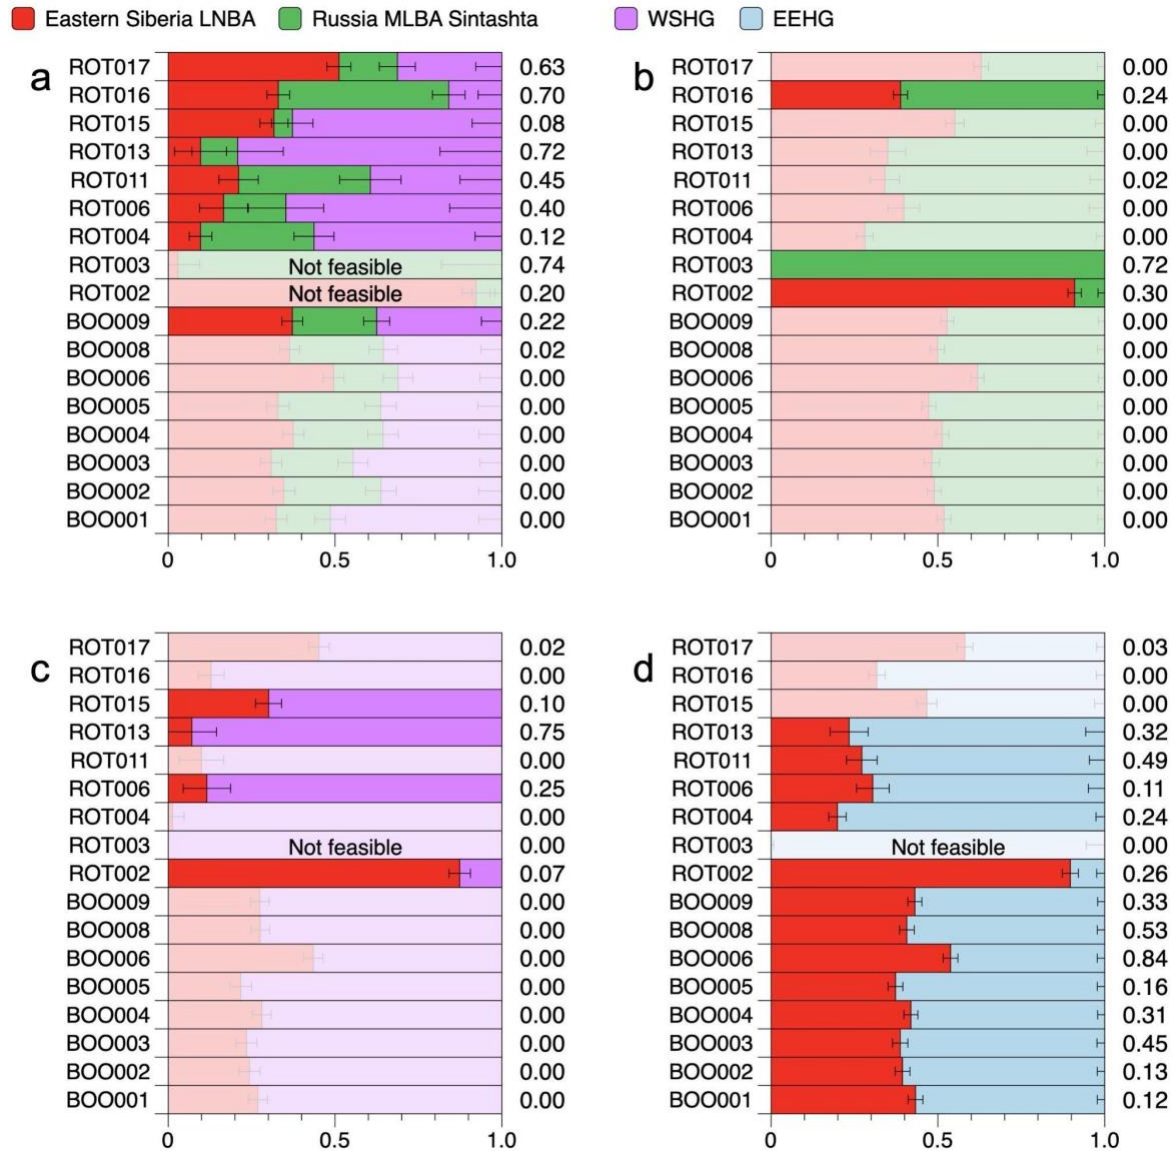

305

306 **Figure 4. Ancestry modeling results for ROT and BOO individuals.** (a) qpAdm models  
 307 using Eastern Siberia LNBA, Russia MLBA Sintashta, and WSHG as sources; (b) qpAdm  
 308 models with Eastern Siberia LNBA and Sintashta as sources; (c) qpAdm models with Eastern  
 309 Siberia LNBA and WSHG as sources; (d) qpAdm models with Eastern Siberia LNBA and  
 310 EEHG as sources. Corresponding p-values for each analysis are shown to the right of each  
 311 row. Models with p-values < 0.05 are grayed out, and the models with negative ancestry  
 312 proportions are indicated as “Not feasible”.

313

314 **Identity-by-descent (IBD) analysis.** We were interested in investigating distant biological  
 315 relatedness among the BOO individuals (ROT individuals are below the required coverage  
 316 threshold for imputation). To do so, we first imputed the genomes of the BOO individuals using  
 317 GLIMPSE<sup>32</sup> with the 1000G dataset<sup>33</sup> as a reference panel. Based on the identification of  
 318 haplotype blocks of certain lengths that are shared between individuals, i.e. identical by

319 descent<sup>34</sup>, we confirmed the 2<sup>nd</sup> degree related pair identified with READ (BOO004-BOO005),  
320 we also found two 3<sup>rd</sup> degree related pairs (BOO003-BOO004 and BOO003-BOO005), as well  
321 as multiple potential 4<sup>th</sup>/5<sup>th</sup>-degree related pairs. The fact that the BOO individuals are distantly  
322 related to each other explains the relative homogeneity seen in the sample compared to ROT.  
323 With regards to the archaeological data from these individuals, two pairs of biologically related  
324 individuals were buried in the same graves, one 4<sup>th</sup>/5<sup>th</sup>-degree related pair: BOO005 (burial 17,  
325 sepulture 3, female) and BOO009 (burial 17, sepulture 4, female), and one 3<sup>rd</sup>-degree related  
326 pair: BOO003 (burial 16, sepulture 1, female) and BOO004 (burial 16, sepulture 3, male)<sup>16</sup>.

327

328 We also looked at IBD sharing between BOO and previously published individuals from groups  
329 that are broadly contemporaneous chronologically and close geographically, including  
330 Tarim\_EMBA<sup>35</sup>, Okunevo<sup>36</sup>, Sintashta\_MLBA<sup>27</sup>, EEHG<sup>37</sup>, Botai<sup>36</sup>, Yamnaya<sup>36</sup>,  
331 Easter\_Siberia\_LNBA<sup>28</sup>, and others (Fig. 5a, Supplementary Table 5). We found three shared  
332 IBD fragments (14-22cM) between BOO individuals and Sintashta\_MLBA individuals  
333 (Supplementary Table 5), potentially suggesting shared ancestors as recent as approximately  
334 500-750 years, and most likely reflecting the shared EEHG ancestry that is present in both  
335 groups.

336

337 Runs of homozygosity. To get a sense of the underlying population structure, general  
338 relatedness, and effective population sizes, we used HapROH to analyze runs-of-  
339 homozygosity (ROH) in the genomes of the BOO individuals, together with already published  
340 individuals with more than 400k SNPs on the 1240k SNP set<sup>38</sup>. We compared BOO to  
341 geographically and genetically close populations from the Eurasian forest steppe area,  
342 including Okunevo, Sintashta\_MLBA, EEHG (UOO), Eastern\_Siberia\_LNBA, Tarim EMBA,  
343 and Fatyanovo (Fig. 5b). We also included two ROT individuals with more than 200K SNPs,  
344 but their results should be interpreted with caution. The ROH analysis of BOO suggests that  
345 this early Metal Age population had a relatively small effective population size of  $\sim 2N=800$ ,  
346 and one of the individuals (BOO006) appears to be an offspring of 2<sup>nd</sup> cousins. Tarim EMBA,  
347 Okunevo, and Eastern\_Siberia\_LNBA groups also seemed to have relatively small effective  
348 population sizes, while Fatyanovo and Sintashta potentially had larger effective population  
349 sizes (Fig. 5b). In comparison, ROT individuals show similar ROH profiles to the populations  
350 they are closely related to, based on the PCA and F-statistics, i.e., ROT002 resembles the  
351 Eastern Siberian LNBA, and ROT017 – BOO (Fig. 5b).

352

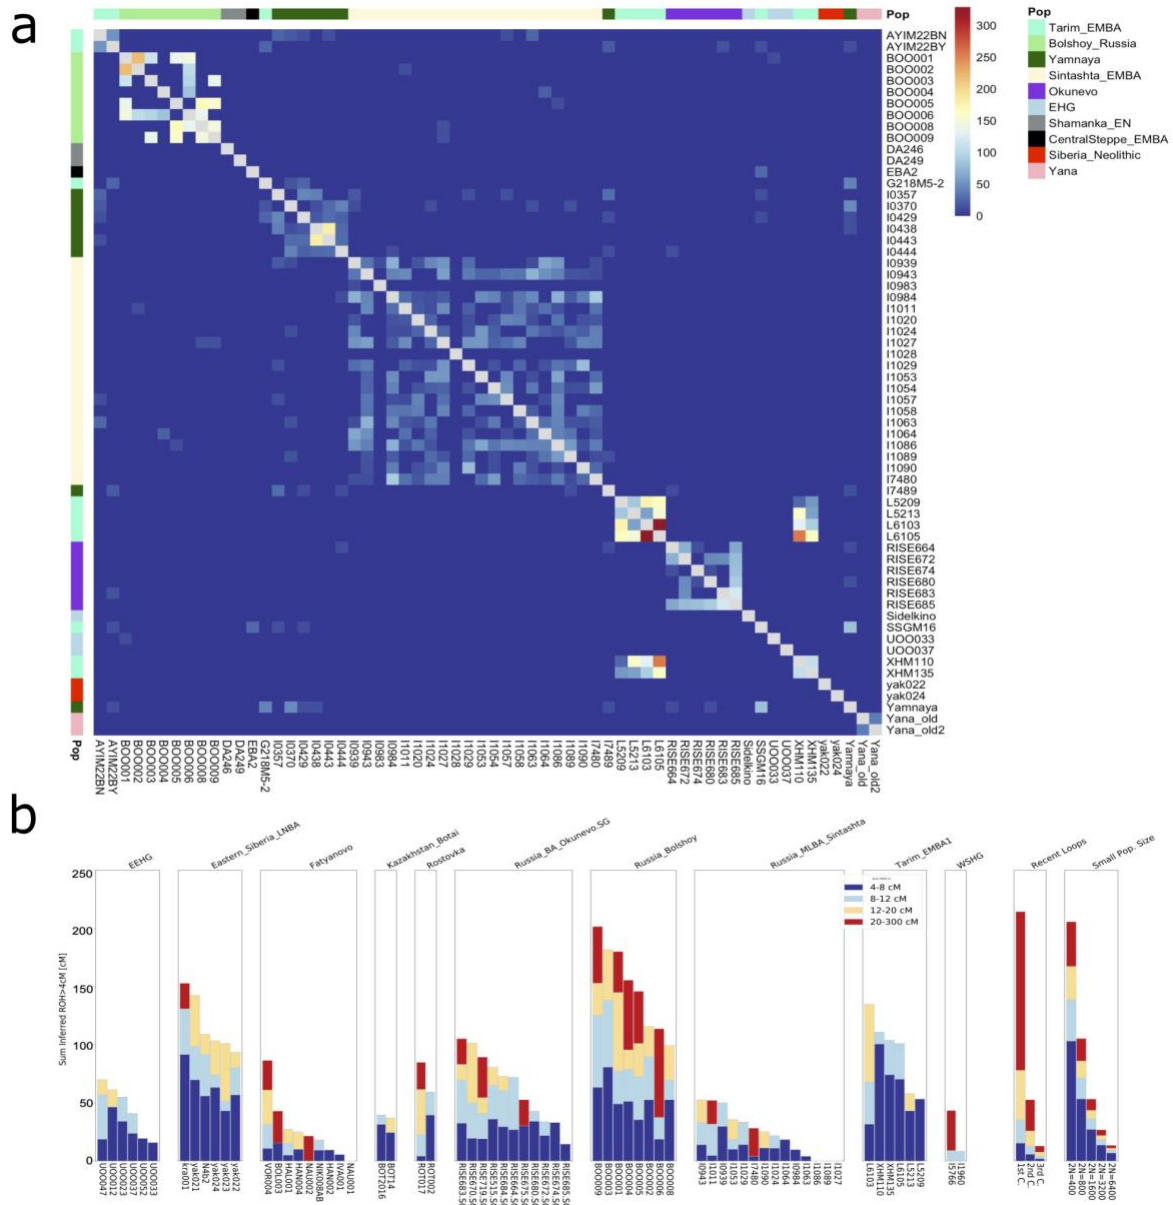

353  
 354 **Figure 5.** (a) IBD sharing between BOO and published data. Shared IBD chunks between 12  
 355 and 30 cM are shown. The total IBD length shared is indicated by the color of the square, and  
 356 population designation is shown on the y-axis. (b) HapROH output for BOO, ROT and relevant  
 357 contemporaneous populations. Runs of homozygosity (ROH) are plotted by population for  
 358 individuals with more than 400k SNPs on the 1240k capture. ROH segments are colored  
 359 according to their binned lengths.

360  
 361

362 **Demographic modeling.** High-coverage shotgun data from BOO004 (~30x) allowed us to  
 363 perform demographic modeling to investigate North Eurasian genetic ancestry and the nature  
 364 of the admixture of the Eastern and Western Eurasian sources found in BOO individuals using  
 365 a site-frequency spectrum (SFS) modeling-based method called momi2<sup>39</sup>. We included

366 published data from representative North Eurasian populations, both preceding and  
367 contemporaneous to BOO. After an incremental build-up of our model and including three  
368 admixture events, our final model indicates a recent admixture for BOO individuals (95%  
369 confidence interval (CI) 3596-4429 years ago), with substantial gene flow (39.9%; 95% CI  
370 34.0-44.8%) from Eastern Eurasians (represented here by Late Neolithic/Bronze Age Siberian  
371 individuals), which is consistent with the results from qpAdm. The population size estimated  
372 for BOO (N=190, 95% CI 6-482) from momi2 (Fig. 6, Supplementary Table 6) is smaller than  
373 the estimate obtained from hapROH (2N between 400 and 800 individuals, Fig. 6). This could  
374 be explained by momi2 not taking into account inbreeding via the analysis of the runs of  
375 homozygosity, and thus producing a biased estimate of the true effective population size. Thus,  
376 we believe that the results produced by hapROH are closer to the true value of the effective  
377 population size.

378

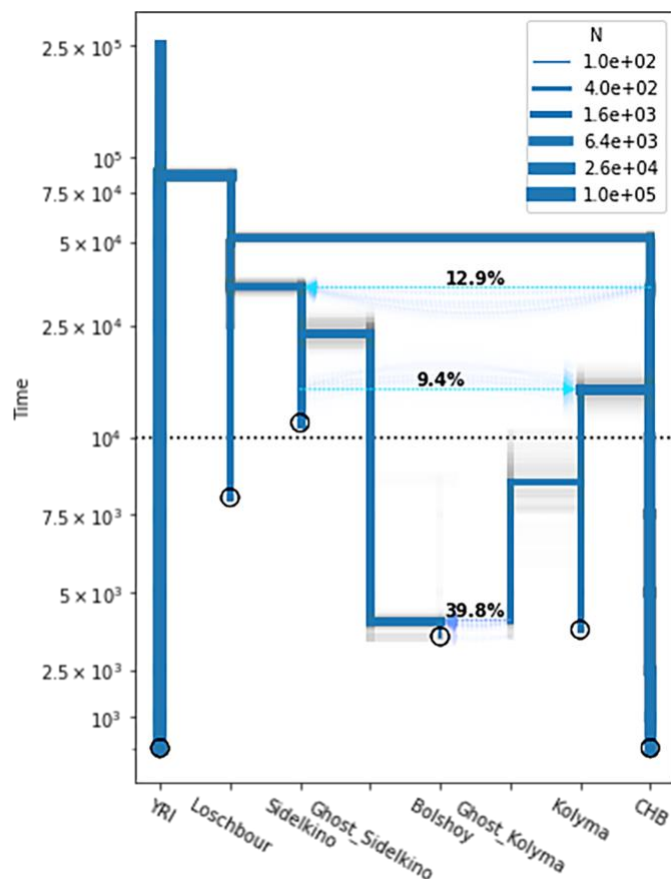

379

380 **Figure 6.** Momi2 demographic model for BOO004 using shotgun sequencing data from  
381 published ancient and modern individuals. Point estimates of the final model are shown in blue;  
382 results for 100 nonparametric bootstraps are shown in gray. The sampling times of populations  
383 are indicated by circles. The population sizes are indicated by the thickness of branches. The  
384 y-axis is linear below 10,000 years ago, and logarithmic above it. See Supplementary Table 6  
385 for specific parameter values. YRI, Yoruba; CHB, Han Chinese.



386

387 **Y-chromosome haplogroups.** We performed Y-haplogroup (Y-hg) typing of the ROT males  
388 using the YMCA method<sup>19</sup> (Table 1). We identified two individuals that carried the R1a Y-hg  
389 (ROT003 (R1a-M417) and ROT016 (R1a-Z645)), one of the most widely distributed Y-hgs in  
390 Eurasia<sup>40</sup>. However, both individuals could be R1a-Z645, since ROT003 does not have either  
391 ancestral or derived ISOGG list SNPs after R1a-M417. The earliest evidence for Y-hg R1a  
392 comes from Mesolithic EEHG individuals<sup>41,42</sup>, and it is widespread throughout Eurasia today,  
393 from Scandinavia to South Asia and Siberia<sup>40</sup>. Specifically, R1a-M417 is common among  
394 Corded Ware-associated individuals<sup>41,43</sup>, while the derived R1a-Z645 is common in the Baltic  
395 Corded Ware<sup>44</sup> and Fatyanovo<sup>13</sup>. Generally, due to their geographic distribution, these R1a  
396 haplogroups are thought to represent the eastward movement of the Corded Ware-, and  
397 Fatyanovo-associated groups.

398 ROT002, the individual with the highest proportion of north Siberian ancestry, was assigned to  
399 the N1a1a1a1a (N-L392) haplogroup. This Y-hg has also been found in two published BOO  
400 individuals<sup>15</sup>. The lineage N-L392 is one of the most common in present-day Uralic  
401 populations, and was estimated to have split from other N-lineages around 4,995 years ago<sup>45</sup>.  
402 This finding further highlights the importance of Y-hg N-L392 as being linked to the  
403 dissemination of proto-Uralic, but potentially also involving the ST network.

404 One of the males (ROT004) was assigned to haplogroup Q1b (Q-M346), which is found  
405 throughout Asia, including in several Turkic speaking populations, i.e. Tuvians, Todjins,  
406 Altaians, Sojots, etc., and Mongolian-speaking Kalmyk population<sup>46</sup>. Another individual  
407 (ROT017) was determined to belong to the Q1b1 (Q-L53) haplogroup, which is common  
408 among present-day Turkic speakers across Eurasia. The branch Q-YP4004 includes Central  
409 Asian Q-L53(xL54) lineages and one ancient Native American individual from Lovelock Cave  
410 in Nevada dated 1.8 ky<sup>47</sup>, and the oldest individual with this haplogroup is irk040 (Cis-Baikal  
411 Neolithic, 4846 BP)<sup>28</sup>. The lineage C2a-L1373, carried by ROT011, is found at high frequency  
412 in Central Asian populations, North Asia and the Americas. C2a-L1373 expanded to North Asia  
413 and the Americas post-LGM, around 17,700–14,300 years ago<sup>48</sup>. Lastly, haplogroup R1b1a1a  
414 (R1b-M73), a sister-clade of R1b-M269, is carried by ROT006. This lineage is common in the  
415 Caucasus, Siberia, Mongolia, and Central Asia today<sup>46</sup>.

416 Overall, the Y-hg lineage diversity of male ROT individuals further highlights the  
417 heterogeneous nature of the ST, which has also been proposed by archaeologists<sup>49</sup>.

418

419 **Mitochondrial haplogroups.** We identified a large diversity in the mitochondrial haplogroups  
420 (mt-hg) among ROT (Table 1), including mt-hgs that are found commonly in east Eurasia (A10,  
421 C1, C4, G2a1)<sup>50–53</sup> and in west Eurasia (H1, H101, U5a, R1b, R1a)<sup>36,54</sup>, and similar to the  
422 trends seen from autosomal and Y-hg point of view. For example, the individual ROT002 with

423 the highest affinity to Siberia\_LNBA and carrying the Y-hg N-L392 also carries a mt-hg G2a1  
424 commonly found in Eastern Eurasia. On the other hand, the individual ROT003 with the highest  
425 affinity to Sintashta\_MLBA and carrying the Corded-ware derived Y-hg R1a1a1, is also a  
426 carrier of the R1a1a mt-hg commonly found in west Eurasia.

427

## 428 **Discussion**

429

430 Metallurgical production is an important human cultural innovation that has been developed  
431 multiple times in multiple locations around the globe, one of which is Bronze Age Eurasia. It is  
432 during the Bronze Age period that the Seima-Turbino transcultural phenomenon is identified  
433 based on the evidence of skilled metallurgical production which is visible in the archaeological  
434 record of Northern Eurasia. The ST phenomenon holds an important place in the development  
435 of metallurgy within the framework of the Bronze Age Northern Eurasia, as the distribution of  
436 knowledge about the usage of Sn is one of its core elements<sup>4</sup>.

437

438 This study is reporting genome-wide data of ST-associated individuals and their connections  
439 to individuals associated with contemporaneous and preceding archaeological groups of the  
440 northern Eurasian forest-steppe and steppe during the Bronze Age, such as Sintashta,  
441 Okunevo, as well as Neolithic and Bronze Age Siberian groups. We also reassess the genetic  
442 structure of BOO individuals of northwestern Russia that have been shown to carry high levels  
443 of Siberian ancestry, an important characteristic of northern Eurasia.

444

445 The observed genetic heterogeneity among the ROT individuals can either suggest a group at  
446 an early stage of admixture, or signify the heterogeneous nature of the ST complex<sup>4</sup>. Together  
447 with evidence from the available archaeological data<sup>4</sup>, we argue that the individuals buried at  
448 ROT more likely represent a variety of genetic and perhaps cultural backgrounds, brought  
449 together by the ST metallurgical network. The findings from genome-wide autosomal data in  
450 PCA, ADMIXTURE and F-statistics are mirrored in the Y-chromosomal and mitochondrial data.  
451 Eight males of nine ROT individuals represent both eastern Eurasian and Western Eurasian  
452 Y-chromosomal lineages, and eastern and western Eurasian mitochondrial lineages,  
453 respectively, further highlighting the genetic heterogeneity seen in ROT. In general, the region  
454 of the Middle Irtysh around Rostovka can be characterized as the typological melting pot of  
455 the western and eastern part of the ST phenomenon mirroring in the genetic data.

456

457 On an individual level, there is no clear correlation between genetic ancestry of the screened  
458 individuals and the cultural/regional attribution of their grave goods. The inventory of the burial  
459 of individual ROT003 with western Eurasian genetic ancestry includes artifacts, which can be

460 attributed to the eastern part of the ST phenomenon (forked lancehead with hook, trapezoidal  
461 socket axe) and there are regionally nonspecific ST-artifacts (lamellar dagger blades, forked  
462 lancehead with two loops), as well as ceramics of the Krotovo and Okunevo cultures. Artifacts  
463 with a connection to the Steppe-related cultures of the Transurals or the western part of the  
464 ST phenomenon are not present. The rather sparse burial of ROT002 does not stand out  
465 typologically in contrast to most other burials of the cemetery, despite the genetic attribution to  
466 the Eastern Siberian LNBA<sup>4,55</sup>.

467

468 In case of BOO, we see a very homogeneous genetic profile that we can model as a recent  
469 mixture of the Neolithic Siberian and EEHG components approximately ~2200-2000 BCE,  
470 which places this event at a similar time as the temporal peak of the ST phenomenon.  
471 Interestingly, despite the geographic location of the burial site on the Kola Peninsula in  
472 northwestern Russia, BOO individuals carry higher proportions of 'eastern' Siberian ancestry  
473 than most ROT individuals. The genetic homogeneity observed in BOO individuals can be  
474 explained by the genetic background relatedness as shown by IBD sharing and ROH analysis,  
475 which is indicative of a relatively small or isolated population.

476 We also find that BOO and ROT exhibit distinct genetic subtleties with regard to the presence  
477 of the Early European Farmer ancestry. Although relatively contemporaneous, ROT  
478 individuals, in general, carry higher levels of Neolithic farmer-related ancestry, which we were  
479 able to model as part of the Sintashta\_MLBA in our admixture models. However, this ancestry  
480 is not present in BOO individuals, which carry HG-related ancestry that is more similar to a  
481 more ancient, but local EEHG stratum (as demonstrated for the nearby Yuzhny Oleni Ostrov  
482 site)<sup>41,56</sup>. The lack of European farmer ancestry in BOO, contrary to what has been reported in  
483 Lamnidis 2018 (Figure 4a), also highlights the natural limits of the farming subsistence practice  
484 and the spread of farmer-related ancestry mediated by MBA forest steppe pastoralists into the  
485 northernmost parts of Eurasia during this time period.

486

487 We tested the individuals in this study with regards to the presence of Ancient North Eurasian  
488 ancestry, also known as the Upper Paleolithic Siberian ancestry that was first described in  
489 individuals from Mal'ta and Afontova Gora 2 and 3<sup>56,57</sup>, and marks a basal North Eurasian  
490 lineage that is shared between modern-day Europeans and Native Americans, but not found  
491 in southern India, East and Southeast Asia. This ancestry is generally associated with groups  
492 falling on the forest tundra genetic cline<sup>25</sup>, and is present in high levels in the Bronze Age Tarim  
493 mummies<sup>35</sup>. We found that the ST individuals vary with regards to their location on the ANE  
494 cline towards Afontova Gora 3 and Mal'ta 1, in line with the findings from PCA and  
495 ADMIXTURE analyses. BOO individuals also carry the ANE ancestry, but in a more  
496 homogeneous fashion.

497

498 With the new data from ROT, we are able to assess a recent proposal which suggested that  
499 Uralic languages could have been used within the ST network leading to the initial spread of  
500 Uralic languages across the Eurasian forest steppe<sup>58–60</sup>. After performing various tests of  
501 genetic structure of the ST-associated individuals, we report genetic profiles on an ancestry  
502 cline that generally mirrors the genetic distribution of modern-day Uralic-speaking populations  
503 of the northernmost forest-tundra (taiga and tundra) ecological cline<sup>25</sup>. Our findings show that  
504 the ST-associated individuals from Rostovka likely did not originate from a single location but  
505 rather represent people from a wide geographical area. Seima-Turbino was a latitudinal  
506 phenomenon on the same east-west axis where also the hypothetical homelands of the  
507 ancestral Uralic subgroups were positioned<sup>61</sup>. Thus, our genetic results are temporally and  
508 geographically consistent with the proposal that Uralic languages could have spread within the  
509 ST network, but are neither a clear nor a direct proof. Further ancient human DNA data from  
510 northern Eurasia will help elucidate the details of the wider spread of ancient Siberian ancestry  
511 and its association with proto-Uralic speaking groups.

512

513 Taken together, our findings show that all but one of the carriers of artifacts associated with  
514 the ST transcultural phenomenon have genetic similarities to the current taiga-tundra area  
515 populations, but harbor an extremely diverse mix of western and eastern Eurasian ancestries.  
516 However, due to the limited number of individuals studied, we cannot be certain as to what  
517 degree the individuals in this study represent the ST phenomenon as a whole. Genetic data  
518 from other confidently ST-associated sites will be crucial in providing a comparative analysis  
519 of the data. Lastly, we investigate the genetic history of the Siberian ancestry in northern  
520 Eurasia, and suggest that there were possibly several waves of migration of people carrying  
521 the Siberian ancestry component, indicating a complex demographic history of the region.

522

## 523 **Materials and Methods**

524

525 **Archaeological background.** Rostovka (ROT) is a ST burial site located on the river Om, in  
526 the city of Omsk, and was excavated in 1966-1969<sup>9</sup>. A total of 38 graves were excavated at  
527 the site, not all of which contained human remains. Some of the individuals buried at Rostovka  
528 were cremated, including ten clear cases of cremation, two graves with charcoal only, and one  
529 case with charcoal and the remains of children<sup>55</sup>.

530

531 The burial ground of Rostovka occupies a very curious position within the ST phenomenon. It  
532 is the largest ST-site east of the foothills of the Ural Mountains. It is, compared to other  
533 important sites like Seima and Turbino, well excavated, documented and published. Rostovka

534 is, together with the smaller sites of Kargat 6 and Preobrazhenka 6, the most eastern point of  
535 the distribution of steppe-related artifacts in ST-contexts. At these three sites also specifically  
536 western ST-artifacts still appear, but in very small numbers. The ceramics of Rostovka are  
537 connected to the Krotovo and other forest-steppe cultures. The stone-artifacts are partly  
538 connected to the traditions of Baikalian stone-tools (little arrowheads, rectangular blades)  
539 partly to the western part of the ST phenomenon (bigger arrowheads, irregular blades) and in  
540 the case of a stone mace head to the Steppe-related cultures of the Transurals<sup>55</sup>. The metal  
541 composition of the artifacts of Rostovka is very comparable to the overall tendencies of the ST  
542 phenomenon. Steppe-related artifacts tend to contain less Sn than regional nonspecific ST-  
543 artifacts. And these nonspecific ST-artifacts contain less Sn than eastern ST-artifacts.

544

545 A total of 19 individuals from Rostovka were screened for ancient DNA preservation using  
546 shotgun sequencing of 5M reads, however, only nine passed the 0.1% endogenous DNA cutoff  
547 to be further analyzed using capture arrays. The low success rate is explained by the fact that  
548 the macroscopic preservation of the skeletal remains was poor in general, and we could only  
549 sample random parts of long bones and few teeth, but no petrous bones

550

551 BOO was first excavated in 1925, with the most recent excavation taking place between 2001-  
552 2004<sup>16</sup>. A total of N=43 individuals were found, along with wooden grave constructions, as well  
553 as bone, antler, stone, ceramic, and bronze items. Most burials were inhumations, with the  
554 exception of three cremations, and most individuals were buried in wooden boat-shaped  
555 caskets<sup>16</sup>.

556

557 **DNA extraction and data generation.** All aDNA work was done in dedicated clean laboratory  
558 facilities following the standard protocols<sup>62</sup>. Briefly, single-stranded libraries were produced for  
559 ROT, and double-stranded UDG-half libraries were produced for the new BOO individuals.  
560 First, shotgun libraries were screened for the presence of endogenous DNA, and samples with  
561 the aDNA content above 0.1% were captured for the 1240k sites. We also produced mtDNA  
562 and Y-haplogroup capture data for the samples included in the study. A set of BOO individuals  
563 were shotgun sequenced to high coverage. The nfcere/eager pipeline v.2.3.5<sup>63</sup> was used to  
564 process the samples from fastq files to the deduplicated bam files. The software version  
565 information is listed in Supplementary Table 7. Briefly, samples were mapped to the hs37d5  
566 version of the human reference genome using bwa aln with the following parameters: bwa aln  
567 -o 3 -n 0.001 -l 16500. Pseudohaploid genotyping calls for the ROT individuals were produced  
568 using pileupcaller (<https://github.com/stschiff/sequenceTools>) with the --singlestrandmode  
569 option. We trimmed two base pairs from bam files of BOO individuals from each side of the  
570 read, and genotyped the samples to produce pseudohaploid calls with pileupcaller

571 (<https://github.com/stschiff/sequenceTools>). The ancient DNA status of the samples was  
572 authenticated using MapDamage v2<sup>64</sup>. Contamination from modern sources was determined  
573 using a combination of contammix<sup>65</sup>, schmutzi<sup>66</sup>, ANGSD X-chromosome contamination  
574 estimate (for males)<sup>67</sup>, and sex determination. READ<sup>20</sup> and pairwise mismatch rate (PMR)  
575 were used to perform biological relatedness analysis. PMRs were calculated from  
576 pseudohaploid genotypes of the 1240k panel.

577

578 **Population genetics analyses.** The projection PCA was done using smartpca<sup>23</sup> including  
579 already published ancient and modern data from the Allen Ancient DNA Resource (AADR)  
580 v44.3<sup>68</sup> using the projection mode, wherein ancient samples were projected upon modern  
581 genetic variation. Unsupervised admixture analysis was done on the ROT and the new BOO  
582 data together with already published ancient DNA samples from the AADR v44.3<sup>68</sup> using  
583 ADMIXTURE<sup>26</sup> for 1-20 K clusters between in 5 iterations. Coefficients of variance for each K  
584 were compared and the best K level was chosen based on the lowest average CV.

585

586 The f-statistics and qpAdm analyses were performed using admixr<sup>69</sup>. The resulting data were  
587 plotted using DataGraph v.4.6.1, and R<sup>70</sup> using the ggplot2 package<sup>71</sup>. For qpAdm, we used  
588 Mbuti, Georgia\_Kotias.SG, Israel\_Natufian\_published, Ami, Mixe, Italy\_North\_Villabruna\_HG,  
589 and ONG.SG as an outgroup set (based on<sup>15</sup>).

590

591 Mitochondrial haplogroups were determined using HaploGrep2<sup>72</sup> using the data from the  
592 mitochondrial capture. Briefly, mitochondrial capture data was mapped to the mitochondrial  
593 reference genome NC\_012920.1 using circularmapper<sup>73</sup> and mapping quality threshold of 30.  
594 Bam files were then imported into Geneios and a consensus fasta file was produced with the  
595 coverage threshold of 5, and Sanger heterozygotes set to >50%. The consensus fasta file was  
596 then imported into HaploGrep2. Y-haplogroup data generated using YMCA was used to assign  
597 Y-chromosome haplogroups to male ROT individuals following the method described in<sup>19</sup>.

598

599 ROH analysis was done using HapROH<sup>38</sup> on the pseudohaploid data from BOO, together with  
600 already published individuals, and only focusing on samples with more than 400k SNPs from  
601 the 1240k SNP array.

602

603 BOO samples were imputed and phased using GLIMPSE<sup>32</sup> following the default parameters,  
604 and merged with already published data, in order to test for patterns of IBD sharing among the  
605 individuals using ancIBD<sup>34</sup>. IBD analyses were restricted to samples covering more than 600K  
606 SNPs with GP>=0.99 after genotype imputation. IBD results were plotted using the R package  
607 pheatmap<sup>74</sup>.

608

609 **Demographic modeling.** We used DATES<sup>30</sup> to determine the time of admixture in BOO using  
610 Yakutia\_Lena and UOO as the two reference sources. Demographic modeling of BOO was  
611 then performed using momi2<sup>39</sup>. To do so, we added several already published samples into  
612 our model to give sufficient background information: two random individuals from YRI (Yoruba  
613 in Ibadan, Nigeria) in 1000 Genomes Project<sup>33</sup> representing the Africans; two random  
614 individuals from CHB (Han Chinese in Beijing, China) in 1000 Genomes Project representing  
615 East Asians; the 8000-year-old Loschbour individual from Luxembourg<sup>75</sup> representing WEHG;  
616 one Mesolithic individual from Sidelkino, Russia<sup>76</sup> representing EEHG; two Late  
617 Neolithic/Bronze Age individuals from Kolyma river regions of Yakutia, Russia<sup>28</sup> representing  
618 the Eastern Siberia LNBA. Ancient samples were downloaded from the European Nucleotide  
619 Archive (ENA) as bam files, and then processed and imputed using GLIMPSE, following the  
620 default parameters<sup>32</sup>. Modern individuals were extracted from the 1000G database<sup>33</sup>. We  
621 assumed a mutation rate of  $1.25 \times 10^{-8}$  per site per generation<sup>77</sup> and a generation time of 29  
622 years<sup>31</sup>. We progressively added more populations into the model. For each step we randomly  
623 initialized the new parameters dozens of times and did optimization respectively, and selected  
624 the best model as the basis of the next step. The initial model involves Western Eurasians  
625 (Loschbour) and Eastern Eurasians (CHB) as a simple split, with Africans (YRI) the outgroup.  
626 Each lineage was modeled to have its own population size. We also defined the ancestral  
627 Eurasian population size and the ancestral modern human size, and let the size of Loschbour  
628 and CHB exponentially change from the ancestral Eurasian size. We then added the EEHG  
629 (Sidelkino) lineage onto Loschbour, and Eastern Siberia LNBA (Kolyma) onto CHB, with their  
630 own population sizes. The shared ANE ancestry in Sidelkino and Kolyma was modeled as  
631 gene flow between Western and Eastern Eurasians. In actual modeling, we defined gene flow  
632 from ancestral Eastern Eurasians to Sidelkino, as well as gene flow from Sidelkino to Kolyma.  
633 At last, we added the highest coverage BOO individual BOO004 (Bolshoy) into the model, as  
634 an admixture of Sidelkino and Kolyma. We finally defined the ghost lineage for two source  
635 populations, with the same population size as their original branch, and modeled the Bolshoy  
636 lineage as the admixture of ghost lineages. When optimizing the final model, we got a series  
637 of similar likelihood results with recent admixture time and small population size in Bolshoy  
638 Oleni Ostrov lineage. We chose the final model whose admixture time matches the conclusion  
639 in DATES. To examine the stability of the parameters, we conducted 100 nonparametric  
640 bootstraps, fit the model for each bootstrap dataset using the parameter values of the final  
641 model as initial values, and computed the 95% confidence interval for each parameter. Each  
642 bootstrap dataset was created by dividing the whole genome into 100 equal-sized blocks and  
643 resampling the same number of blocks with replacement.

644

645 **Data Availability.** Genomic data (BAM and fastq formats) are available on the European  
646 Nucleotide Archive (ENA) under accession number PRJEBXXX, genotypes in eigenstrat  
647 format can be found at <https://edmond.mpdl.mpg.de>.

648

## 649 **Acknowledgments**

650

651 We would like to thank all members of the Department of Archaeogenetics at the Max Planck  
652 Institute for Evolutionary Anthropology, the PALEoRIDER & Population Genetics Group. We  
653 also thank Dr. Elina Salmela for her suggestions and comments, and Dr. Rüdiger Krause. This  
654 work was funded by the European Research Council (ERC) under the European Union's  
655 Horizon 2020 research and innovation program under grant agreement no. 771234-  
656 PALEoRIDER (to W.H.). Kuzminykh S.V. was supported by the program from the Archaeology  
657 Institute of the Russian Academy of Sciences No. NIOKTR 122022200264-9. Fabian Fricke  
658 was funded through a DFG grant titled "Zur Metallurgie der bronzzeitlichen Artefakte des  
659 Fundplatzes Sajtanska (nördlich von Ekaterinburg) vom Typ Sejmo-Turbino in Eurasien" (Dr.  
660 Rüdiger Krause).

661

662

## 663 **References**

- 664 1. Chernykh, E. N. *Ancient Metallurgy in the USSR: The Early Metal Age*. (CUP Archive,  
665 1992).
- 666 2. Kohl, P. L. *The Making of Bronze Age Eurasia*. (Cambridge University Press, 2007).
- 667 3. Hanks, B. K., Epimakhov, A. V. & Renfrew, A. C. Towards a refined chronology for the  
668 Bronze Age of the southern Urals, Russia. *Antiquity* **81**, 353–367 (2007).
- 669 4. Chernykh, E. N. & Kuzminykh, S. V. Древняя металлургия Северной Евразии  
670 (сейминско-турбинский феномен). <https://elibrary.ru/item.asp?id=21143678> (1989).
- 671 5. Linduff, K. M. Metallurgy in ancient eastern Eurasia. in *Encyclopaedia of the History of*  
672 *Science, Technology, and Medicine in Non-Western Cultures* 3103–3116 (Springer  
673 Netherlands, 2016).
- 674 6. Кузьминых, С. В. Сейминско-турбинская проблема: новые материалы. *Краткие*  
675 *сообщения Института археологии* 240–263 (2011).
- 676 7. Korochkova, O. *Sacred Place of the First Metallurgists in the Middle Ural*.  
677 (Издательство Уральского университета, 2020).
- 678 8. Parpola, A. Formation of the Indo-European and Uralic (Finno-Ugric) language families  
679 in the light of archaeology: Revised and integrated “total” correlations.  
680 [https://researchportal.helsinki.fi/files/127256289/Parpola\\_A\\_2012.\\_Formation\\_of\\_the\\_Indo\\_European\\_and\\_Uralic\\_language\\_families\\_in\\_the\\_light\\_of\\_archaeology.\\_MSFOu\\_26](https://researchportal.helsinki.fi/files/127256289/Parpola_A_2012._Formation_of_the_Indo_European_and_Uralic_language_families_in_the_light_of_archaeology._MSFOu_26)  
681



- 682 6.pdf (2012).
- 683 9. Marchenko, Z. V., Svyatko, S. V., Molodin, V. I., Grishin, A. E. & Rykun, M. P.  
684 Radiocarbon Chronology of Complexes With Seima-Turbino Type Objects (Bronze Age)  
685 in Southwestern Siberia. *Radiocarbon* **59**, 1381–1397 (2017).
- 686 10. Chernykh, E. N. *et al.* Issues in the calendar chronology of the seima-turbino  
687 transcultural phenomenon. *Archaeol. Ethnol. Anthropol. Eurasia (Russ.-lang.)* **45**, 45–55  
688 (2017).
- 689 11. Ковтун, И. В., Марочкин, А. Г. & Герман, П. В. Радиоуглеродные даты и  
690 относительная хронология сейминско-турбинских, крохалёвских и самусьских  
691 древностей. *Труды V (XXI) Всероссийского* (2017).
- 692 12. Tambets, K. *et al.* Genes reveal traces of common recent demographic history for most  
693 of the Uralic-speaking populations. *Genome Biology* vol. 19 Preprint at  
694 <https://doi.org/10.1186/s13059-018-1522-1> (2018).
- 695 13. Saag, L. *et al.* The Arrival of Siberian Ancestry Connecting the Eastern Baltic to Uralic  
696 Speakers further East. *Curr. Biol.* **29**, 1701-1711.e16 (2019).
- 697 14. Der Sarkissian, C. *et al.* Ancient DNA reveals prehistoric gene-flow from siberia in the  
698 complex human population history of North East Europe. *PLoS Genet.* **9**, e1003296  
699 (2013).
- 700 15. Lamnidis, T. C. *et al.* Ancient Fennoscandian genomes reveal origin and spread of  
701 Siberian ancestry in Europe. *Nat. Commun.* **9**, 5018 (2018).
- 702 16. Murashkin, Kolpakov & Shumkin. Kola Oleneostrovskiy grave field: a unique burial site  
703 in the European Arctic. *Iskos* (2016).
- 704 17. Mathieson, I. *et al.* Genome-wide patterns of selection in 230 ancient Eurasians. *Nature*  
705 **528**, 499–503 (2015).
- 706 18. Fu, Q. *et al.* An early modern human from Romania with a recent Neanderthal ancestor.  
707 *Nature* **524**, 216–219 (2015).
- 708 19. Rohrlach, A. B. *et al.* Using Y-chromosome capture enrichment to resolve haplogroup  
709 H2 shows new evidence for a two-path Neolithic expansion to Western Europe. *Sci.*  
710 *Rep.* **11**, 15005 (2021).
- 711 20. Monroy Kuhn, J. M., Jakobsson, M. & Günther, T. Estimating genetic kin relationships in  
712 prehistoric populations. *PLoS One* **13**, e0195491 (2018).
- 713 21. Lipatov, M., Sanjeev, K., Patro, R. & Veeramah, K. R. Maximum Likelihood Estimation of  
714 Biological Relatedness from Low Coverage Sequencing Data. *bioRxiv* 023374 (2015)  
715 doi:10.1101/023374.
- 716 22. Ramsey, C. B. Bayesian Analysis of Radiocarbon Dates. *Radiocarbon* **51**, 337–360  
717 (2009).
- 718 23. Patterson, N., Price, A. L. & Reich, D. Population structure and eigenanalysis. *PLoS*

- 719        *Genet.* **2**, e190 (2006).
- 720    24. Wang, C.-C. *et al.* Ancient human genome-wide data from a 3000-year interval in the  
721        Caucasus corresponds with eco-geographic regions. *Nat. Commun.* **10**, 1–13 (2019).
- 722    25. Jeong, C. *et al.* The genetic history of admixture across inner Eurasia. *Nat Ecol Evol* **3**,  
723        966–976 (2019).
- 724    26. Alexander, D. H., Novembre, J. & Lange, K. Fast model-based estimation of ancestry in  
725        unrelated individuals. *Genome Res.* **19**, 1655–1664 (2009).
- 726    27. Narasimhan, V. M. *et al.* The formation of human populations in South and Central Asia.  
727        *Science* **365**, (2019).
- 728    28. Kılınc, G. M. *et al.* Human population dynamics and *Yersinia pestis* in ancient northeast  
729        Asia. *Sci Adv* **7**, (2021).
- 730    29. Patterson, N. *et al.* Ancient admixture in human history. *Genetics* **192**, 1065–1093  
731        (2012).
- 732    30. Chintalapati, M., Patterson, N. & Moorjani, P. Reconstructing the spatiotemporal  
733        patterns of admixture during the European Holocene using a novel genomic dating  
734        method. *bioRxiv* 2022.01.18.476710 (2022) doi:10.1101/2022.01.18.476710.
- 735    31. Fenner, J. N. Cross-cultural estimation of the human generation interval for use in  
736        genetics-based population divergence studies. *Am. J. Phys. Anthropol.* **128**, 415–423  
737        (2005).
- 738    32. Rubinacci, S., Ribeiro, D. M., Hofmeister, R. J. & Delaneau, O. Efficient phasing and  
739        imputation of low-coverage sequencing data using large reference panels. *Nat. Genet.*  
740        **53**, 120–126 (2021).
- 741    33. 1000 Genomes Project Consortium *et al.* A global reference for human genetic variation.  
742        *Nature* **526**, 68–74 (2015).
- 743    34. Ringbauer, H. *et al.* ancIBD - Screening for identity by descent segments in human  
744        ancient DNA. *bioRxiv* 2023.03.08.531671 (2023) doi:10.1101/2023.03.08.531671.
- 745    35. Zhang, F. *et al.* The genomic origins of the Bronze Age Tarim Basin mummies. *Nature*  
746        **599**, 256–261 (2021).
- 747    36. de Barros Damgaard, P. *et al.* The first horse herders and the impact of early Bronze  
748        Age steppe expansions into Asia. *Science* **360**, eaar7711 (2018).
- 749    37. Posth, C. *et al.* Palaeogenomics of upper Palaeolithic to neolithic European hunter-  
750        gatherers. *Nature* **615**, 117–126 (2023).
- 751    38. Ringbauer, H., Novembre, J. & Steinrücken, M. Parental relatedness through time  
752        revealed by runs of homozygosity in ancient DNA. *Nat. Commun.* **12**, 1–11 (2021).
- 753    39. Kamm, J., Terhorst, J., Durbin, R. & Song, Y. S. Efficiently inferring the demographic  
754        history of many populations with allele count data. *J. Am. Stat. Assoc.* **115**, 1472–1487  
755        (2020).

- 756 40. Underhill, P. A. *et al.* The phylogenetic and geographic structure of Y-chromosome  
757 haplogroup R1a. *Eur. J. Hum. Genet.* **23**, 124–131 (2015).
- 758 41. Haak, W. *et al.* Massive migration from the steppe was a source for Indo-European  
759 languages in Europe. *Nature* **522**, 207–211 (2015).
- 760 42. Saag, L. *et al.* Genetic ancestry changes in Stone to Bronze Age transition in the East  
761 European plain. *Sci Adv* **7**, (2021).
- 762 43. Papac, L. *et al.* Dynamic changes in genomic and social structures in third millennium  
763 BCE central Europe. *Sci Adv* **7**, (2021).
- 764 44. Saag, L. *et al.* Extensive Farming in Estonia Started through a Sex-Biased Migration  
765 from the Steppe. *Curr. Biol.* **27**, 2185-2193.e6 (2017).
- 766 45. Ilumäe, A.-M. *et al.* Human Y Chromosome Haplogroup N: A Non-trivial Time-Resolved  
767 Phylogeography that Cuts across Language Families. *Am. J. Hum. Genet.* **99**, 163–173  
768 (2016).
- 769 46. Malyarchuk, B. *et al.* Ancient links between Siberians and Native Americans revealed by  
770 subtyping the Y chromosome haplogroup Q1a. *J. Hum. Genet.* **56**, 583–588 (2011).
- 771 47. Grugni, V. *et al.* Analysis of the human Y-chromosome haplogroup Q characterizes  
772 ancient population movements in Eurasia and the Americas. *BMC Biol.* **17**, 3 (2019).
- 773 48. Sun, J. *et al.* Post-last glacial maximum expansion of Y-chromosome haplogroup C2a-  
774 L1373 in northern Asia and its implications for the origin of Native Americans. *Am. J.*  
775 *Phys. Anthropol.* **174**, 363–374 (2021).
- 776 49. Molodin & Durakov. The adaptation of the Seima-Turbino tradition to the Bronze Age  
777 cultures in the south of the West Siberian plain. *& Anthropology of ....*
- 778 50. Schurr, T. G., Sukernik, R. I., Starikovskaya, Y. B. & Wallace, D. C. Mitochondrial DNA  
779 variation in Koryaks and Itel'men: population replacement in the Okhotsk Sea-Bering  
780 Sea region during the Neolithic. *Am. J. Phys. Anthropol.* **108**, 1–39 (1999).
- 781 51. Volodko, N. V. *et al.* Mitochondrial genome diversity in arctic Siberians, with particular  
782 reference to the evolutionary history of Beringia and Pleistocenic peopling of the  
783 Americas. *Am. J. Hum. Genet.* **82**, 1084–1100 (2008).
- 784 52. Pilipenko, A. S., Trapezov, R. O., Zhuravlev, A. A., Molodin, V. I. & Romaschenko, A. G.  
785 MtDNA Haplogroup A10 Lineages in Bronze Age Samples Suggest That Ancient  
786 Autochthonous Human Groups Contributed to the Specificity of the Indigenous West  
787 Siberian Population. *PLoS One* **10**, e0127182 (2015).
- 788 53. Tanaka, M. *et al.* Mitochondrial genome variation in eastern Asia and the peopling of  
789 Japan. *Genome Res.* **14**, 1832–1850 (2004).
- 790 54. Ning, C. *et al.* Ancient Mitochondrial Genomes Reveal Extensive Genetic Influence of  
791 the Steppe Pastoralists in Western Xinjiang. *Front. Genet.* **12**, 740167 (2021).
- 792 55. Matyushenko, V. I. & Sinitsina, G. V. Могильник у д. Ростовка вблизи Омска [Burial

- 793 Ground near the Village of Rostovka near Omsk].  
794 <https://elibrary.ru/item.asp?id=24232508> (1988).
- 795 56. Fu, Q. *et al.* The genetic history of Ice Age Europe. *Nature* **534**, 200–205 (2016).
- 796 57. Raghavan, M. *et al.* Upper Palaeolithic Siberian genome reveals dual ancestry of Native  
797 Americans. *Nature* **505**, 87–91 (2014).
- 798 58. Asko, P. LOCATION OF THE URALIC PROTO-LANGUAGE IN THE KAMA RIVER  
799 VALLEY AND THE URALIC SPEAKERS' EXPANSION EAST AND WEST WITH THE  
800 'SEJMA-TURBINO TRANSCULTURAL PHENOMENON' 2200-1900 BC. *Археология*  
801 *евразийских степей* 258–277 (2022).
- 802 59. Grünthal, R. *et al.* Drastic demographic events triggered the Uralic spread. *Diachronica*  
803 **39**, 490–524 (2022).
- 804 60. Kovtun, I. V. *Предыстория индоарийской мифологии [Prehistory of Indo-Aryan*  
805 *mythology]*. (Азия-принт, 2013).
- 806 61. Saarikivi, J. The divergence of Proto-Uralic and its offspring. *The Oxford Guide to the*  
807 *Uralic Languages* 28–58 Preprint at  
808 <https://doi.org/10.1093/oso/9780198767664.003.0002> (2022).
- 809 62. A Fellows Yates, J. *et al.* A-Z of ancient DNA protocols for shotgun Illumina Next  
810 Generation Sequencing v2. (2021) doi:10.17504/protocols.io.bvt9n6r6.
- 811 63. Fellows Yates, J. A. *et al.* Reproducible, portable, and efficient ancient genome  
812 reconstruction with nf-core/eager. *PeerJ* **9**, e10947 (2021).
- 813 64. Jónsson, H., Ginolhac, A., Schubert, M., Johnson, P. L. F. & Orlando, L.  
814 mapDamage2.0: fast approximate Bayesian estimates of ancient DNA damage  
815 parameters. *Bioinformatics* **29**, 1682–1684 (2013).
- 816 65. Fu, Q. *et al.* A revised timescale for human evolution based on ancient mitochondrial  
817 genomes. *Curr. Biol.* **23**, 553–559 (2013).
- 818 66. Renaud, G., Slon, V., Duggan, A. T. & Kelso, J. Schmutzi: estimation of contamination  
819 and endogenous mitochondrial consensus calling for ancient DNA. *Genome Biol.* **16**,  
820 224 (2015).
- 821 67. Korneliussen, T. S., Albrechtsen, A. & Nielsen, R. ANGSD: Analysis of Next Generation  
822 Sequencing Data. *BMC Bioinformatics* **15**, 356 (2014).
- 823 68. Mallick, S. *et al.* The Allen Ancient DNA Resource (AADR): A curated compendium of  
824 ancient human genomes. *bioRxiv* 2023.04.06.535797 (2023)  
825 doi:10.1101/2023.04.06.535797.
- 826 69. Petr, M., Vernet, B. & Kelso, J. admixr—R package for reproducible analyses using  
827 ADMIXTOOLS. *Bioinformatics* **35**, 3194–3195 (2019).
- 828 70. R Core Team, A., Team, R. C. & Others. R: A language and environment for statistical  
829 computing. R Foundation for Statistical Computing, Vienna, Austria. 2012. Preprint at

- 830 (2022).
- 831 71. Wickham, H. *ggplot2: Elegant Graphics for Data Analysis*. (Springer International  
832 Publishing, 2016).
- 833 72. Weissensteiner, H. *et al.* HaploGrep 2: mitochondrial haplogroup classification in the era  
834 of high-throughput sequencing. *Nucleic Acids Res.* **44**, W58-63 (2016).
- 835 73. Peltzer, A. *et al.* EAGER: efficient ancient genome reconstruction. *Genome Biol.* **17**, 60  
836 (2016).
- 837 74. Kolde, R. *pheatmap: Pretty heatmaps*. (Github, 2012).
- 838 75. Lazaridis, I. *et al.* Ancient human genomes suggest three ancestral populations for  
839 present-day Europeans. *Nature* **513**, 409–413 (2014).
- 840 76. Damgaard, P. de B. *et al.* 137 ancient human genomes from across the Eurasian  
841 steppes. *Nature* **557**, 369–374 (2018).
- 842 77. Fu, Q. *et al.* Genome sequence of a 45,000-year-old modern human from western  
843 Siberia. *Nature* **514**, 445–449 (2014).
- 844
